## Sex-related differences in clinical features and in-hospital outcomes of acute aortic dissection type b

T. Takahashi, H. Yoshino, K. Akutsu, T. Shimokawa, H. Ogino, T. Kuniyama, M. Usui, K. Watanabe, M. Kawata, H. Masuhara, M. Yamasaki, K. Hagiya, T. Yamamoto, K. Nagao, M. Takayama

*Tokyo CCU Network, Tokyo, Japan*

On behalf of Tokyo Acute Aortic Super-network

**Funding Acknowledgement:** Type of funding source: None

**Background:** Acute aortic dissection (AAD) is a life-threatening medical condition with high morbidity and mortality. The association between female sex and poorer outcomes following surgery for AAD type A has been reported; however, the sex-related differences in clinical features and in-hospital outcomes of AAD type B remain to be elucidated.

**Methods:** We studied a total of 1877 patients with AAD type B who were enrolled in the Tokyo Acute Aortic Super-network from January 2013 to December 2016. Clinical features and in-hospital outcomes were compared between sexes. Independent predictors of in-hospital mortality were assessed using a multivariable analysis.

**Results:** The mean age of the patients was 69±13 years and 549 (29%) were females. Female patients were older than males (74±13 years vs 67±13 years;  $p<0.001$ ). Females had lower systolic blood pressure on admission (158±37 mmHg vs 164±38 mmHg;  $p=0.007$ ) and were more likely to have altered consciousness level at presentation (8.7% vs 3.9%;  $p<0.001$ ), intramural hematoma (IMH)-type AAD (62.7% vs 53.6%;

$p<0.001$ ), and DeBakey type IIIa (28.4% vs 21.8%;  $p=0.002$ ) compared with males. Females were treated with medical therapy alone more frequently (90.3% vs 85.9%;  $p=0.009$ ) and had a higher in-hospital mortality rate (5.3% vs 2.6%;  $p=0.036$ ). A multivariable analysis revealed that age [per year, odds ratio (OR) 1.06; 95% CI 1.04–1.09;  $p<0.001$ ], altered consciousness level (OR 3.28; 95% CI 1.54–6.98;  $p=0.002$ ), shock/hypotension (OR 14.0; 95% CI 5.92–33.1;  $p<0.001$ ), classic-type AAD (OR 2.54; 95% CI 1.36–4.73;  $p=0.003$ ), and medical therapy alone (OR 0.28; 95% CI 0.15–0.54;  $p<0.001$ ) were independent predictors of in-hospital mortality, whereas female sex was not predictive of in-hospital mortality (OR 1.64; 95% CI 0.91–2.96;  $p=0.10$ ).

**Conclusion:** In AAD type B, females were older and had altered consciousness level, IMH-type, and a less widespread dissection more frequently than males. The overall in-hospital mortality was higher in females; however, female sex was not associated with in-hospital mortality after multivariable adjustment.
